# Supplementary material for: Resurgence of Chloramphenicol Resistance in Methicillin-Resistant Staphylococcus aureus Due to the Acquisition of a Variant Florfenicol Exporter (fexAv)-Mediated Chloramphenicol Resistance in Kuwait Hospitals
Source: MDPI journal article supplement (doi:10.3390/antibiotics10101250), 2021-10-15
Supplement: s1 [file s1]

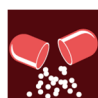

Supplementary

# Resurgence of Chloramphenicol Resistance in Methicillin-Resistant *Staphylococcus aureus* Due to the Acquisition of a Variant Florfenicol Exporter (*fexAv*)-Mediated Chloramphenicol Resistance in Kuwait Hospitals

Edet E. Udo \*, Samar S. Boswihi, Bindu Mathew, Bobby Noronha, and Tina Verghese

Department of Microbiology, Faculty of Medicine, Kuwait University; Kuwait City, Kuwait; [samar.boswihi@ku.edu.kw](mailto:samar.boswihi@ku.edu.kw) (S.S.B.); [bindujmk@gmail.com](mailto:bindujmk@gmail.com) (B.M.); [bobby.vaz@gmail.com](mailto:bobby.vaz@gmail.com) (B.N.); [tinajay@gmail.com](mailto:tinajay@gmail.com) (T.V.)

\* Correspondence: [udo.ekpenyong@ku.edu.kw](mailto:udo.ekpenyong@ku.edu.kw); Tel.: +965-99553167

Table S1. Virulence gene profile of chloramphenicol-resistant MRSA isolates.

| Virulence Factors            | ST627-VI-t688<br>(MRSA-VI<br>+SCCfus) | ST5-V-t688<br>(WA MRSA<br>11/34) | ST5-V-t688<br>(WA MRSA 81/<br>85) | ST627-VI-t450<br>(MRSA-VI<br>+SCCfus) | ST627-VI-t954<br>(MRSA-VI<br>+SCCfus) | ST239-III-t860<br>(Vienna/Brazil-<br>ian) | ST239-III-t037<br>(Vienna/Brazil-<br>ian) |
|------------------------------|---------------------------------------|----------------------------------|-----------------------------------|---------------------------------------|---------------------------------------|-------------------------------------------|-------------------------------------------|
| <b>Regulatory Genes</b>      |                                       |                                  |                                   |                                       |                                       |                                           |                                           |
| <i>sarA</i>                  | +                                     | +                                | +                                 | +                                     | +                                     | +                                         | +                                         |
| <i>saes</i>                  | +                                     | +                                | +                                 | +                                     | +                                     | +                                         | +                                         |
| <i>agrI</i>                  | -                                     | -                                | -                                 | -                                     | -                                     | +                                         | +                                         |
| <i>agrII</i>                 | +                                     | +                                | +                                 | +                                     | +                                     | -                                         | -                                         |
| <b>Enterotoxins</b>          |                                       |                                  |                                   |                                       |                                       |                                           |                                           |
| <i>sea</i>                   | +                                     | +                                | +                                 | +                                     | +                                     | -                                         | +                                         |
| <i>sed</i>                   | +                                     | +                                | -                                 | +                                     | +                                     | -                                         | -                                         |
| <i>sej</i>                   | +                                     | +                                | -                                 | +                                     | +                                     | -                                         | -                                         |
| <i>sek</i>                   | -                                     | -                                | -                                 | -                                     | -                                     | +                                         | +                                         |
| <i>seq</i>                   | -                                     | -                                | -                                 | -                                     | -                                     | +                                         | +                                         |
| <i>ser</i>                   | +                                     | +                                | -                                 | +                                     | +                                     | -                                         | -                                         |
| <i>egc</i>                   | +                                     | +                                | +                                 | +                                     | +                                     | -                                         | -                                         |
| <b>Leukocidins</b>           |                                       |                                  |                                   |                                       |                                       |                                           |                                           |
| <i>lukF</i>                  | +                                     | +                                | +                                 | +                                     | +                                     | +                                         | +                                         |
| <i>lukS</i>                  | +                                     | +                                | +                                 | +                                     | +                                     | +                                         | +                                         |
| <i>lukD</i>                  | +                                     | +                                | +                                 | +                                     | +                                     | +                                         | +                                         |
| <i>lukE</i>                  | +                                     | +                                | +                                 | +                                     | +                                     | +                                         | +                                         |
| <i>lukX</i>                  | +                                     | +                                | +                                 | +                                     | +                                     | +                                         | +                                         |
| <i>lukY</i>                  | +                                     | +                                | +                                 | +                                     | +                                     | +                                         | +                                         |
| <b>Hemolysins</b>            |                                       |                                  |                                   |                                       |                                       |                                           |                                           |
| <i>hlgA</i>                  | +                                     | +                                | +                                 | +                                     | +                                     | +                                         | +                                         |
| <i>hld</i>                   | +                                     | +                                | +                                 | +                                     | +                                     | +                                         | +                                         |
| <i>hl</i>                    | +                                     | +                                | +                                 | +                                     | +                                     | +                                         | +                                         |
| <i>hla</i>                   | +                                     | +                                | +                                 | +                                     | +                                     | +                                         | -                                         |
| <i>hly</i>                   | +                                     | +                                | +                                 | +                                     | +                                     | +                                         | +                                         |
| <i>hlIII</i>                 | +                                     | +                                | +                                 | +                                     | +                                     | +                                         | +                                         |
| <b>Hly-Converting Phages</b> |                                       |                                  |                                   |                                       |                                       |                                           |                                           |
| <i>Sak</i>                   | +                                     | +                                | +                                 | +                                     | +                                     | +                                         | +                                         |
| <i>Chp</i>                   | -                                     | -                                | -                                 | -                                     | -                                     | +                                         | -                                         |
| <i>Scn</i>                   | +                                     | +                                | +                                 | +                                     | +                                     | +                                         | +                                         |

| Capsular Polysaccharide Associated Genes     |                                       |                                  |                                   |                                       |                                       |                                           |                                           |
|----------------------------------------------|---------------------------------------|----------------------------------|-----------------------------------|---------------------------------------|---------------------------------------|-------------------------------------------|-------------------------------------------|
| <i>Cap 5</i>                                 | +                                     | +                                | +                                 | +                                     | +                                     | -                                         | -                                         |
| <i>Cap 8</i>                                 | -                                     | -                                | -                                 | -                                     | -                                     | +                                         | +                                         |
| Virulence Factors                            | ST627-VI-t688<br>(MRSA-VI<br>+SCCfus) | ST5-V-t688<br>(WA MRSA<br>11/34) | ST5-V-t688<br>(WA MRSA 81/<br>85) | ST627-VI-t450<br>(MRSA-VI<br>+SCCfus) | ST627-VI-t954<br>(MRSA-VI<br>+SCCfus) | ST239-III-t860<br>(Vienna/Brazil-<br>ian) | ST239-III-t037<br>(Vienna/Brazil-<br>ian) |
| <b>Proteases</b>                             |                                       |                                  |                                   |                                       |                                       |                                           |                                           |
| <i>Aur</i>                                   | +                                     | +                                | +                                 | +                                     | +                                     | +                                         | +                                         |
| <i>splA</i>                                  | +                                     | +                                | +                                 | +                                     | +                                     | -                                         | +                                         |
| <i>splB</i>                                  | +                                     | +                                | +                                 | +                                     | +                                     | -                                         | +                                         |
| <i>splE</i>                                  | -                                     | -                                | -                                 | -                                     | -                                     | -                                         | +                                         |
| <i>sspA</i>                                  | +                                     | +                                | +                                 | +                                     | +                                     | +                                         | +                                         |
| <i>sspB</i>                                  | +                                     | +                                | +                                 | +                                     | +                                     | +                                         | +                                         |
| <b>Adhesion Factors</b>                      |                                       |                                  |                                   |                                       |                                       |                                           |                                           |
| <i>clfA</i>                                  | +                                     | +                                | +                                 | +                                     | +                                     | +                                         | +                                         |
| <i>clfB</i>                                  | +                                     | +                                | +                                 | +                                     | +                                     | +                                         | +                                         |
| <i>cna</i>                                   | -                                     | -                                | -                                 | -                                     | -                                     | +                                         | +                                         |
| <i>Fib</i>                                   | +                                     | +                                | +                                 | +                                     | +                                     | +                                         | +                                         |
| <i>fnbA</i>                                  | +                                     | +                                | +                                 | +                                     | +                                     | +                                         | +                                         |
| <i>fnbB</i>                                  | +                                     | +                                | +                                 | +                                     | +                                     | +                                         | +                                         |
| <i>map</i>                                   | +                                     | +                                | +                                 | +                                     | +                                     | +                                         | +                                         |
| <i>sasG</i>                                  | +                                     | +                                | +                                 | +                                     | +                                     | +                                         | +                                         |
| <b>Biofilm Associated Genes</b>              |                                       |                                  |                                   |                                       |                                       |                                           |                                           |
| <i>icaA</i>                                  | +                                     | +                                | +                                 | +                                     | +                                     | +                                         | +                                         |
| <i>icaC</i>                                  | +                                     | +                                | +                                 | +                                     | +                                     | +                                         | +                                         |
| <i>icaD</i>                                  | +                                     | +                                | +                                 | +                                     | +                                     | +                                         | +                                         |
| <b>Type1 Restriction Modification System</b> |                                       |                                  |                                   |                                       |                                       |                                           |                                           |
| <i>hsdS1</i>                                 |                                       |                                  |                                   |                                       |                                       |                                           |                                           |
| <i>hsdS2</i>                                 | -                                     | +                                | +                                 | -                                     | -                                     | +                                         | +                                         |
| <i>hsdS3</i>                                 | +                                     | +                                | +                                 | +                                     | +                                     | -                                         | +                                         |
| <i>hsdSx (CC25)</i>                          | -                                     | +                                | +                                 | +                                     | +                                     | +                                         | +                                         |
| <i>hsdSx (CC15)</i>                          | +                                     | -                                | -                                 | -                                     | -                                     | -                                         | -                                         |

**Abbreviations:** aur, aureolysin, hlgA, haemolysin gamma; hla, haemolysin alpha; hlb, haemolysin beta; hl/hlIII, putative membrane protein; sak, staphylokinase; chp, chemotaxis-inhibiting protein; scn, staphylococcal complement inhibitor, clfA, clumping factor A; clfB, clumping factor B; fnbA, fibronectin-binding protein A; fnbB, fibronectin-binding protein map, major histocompatibility complex class II; cna, collagen-binding adhesin. SplA, serinprotease A, SplB, serinprotease B, SplE, serinprotease E, sspA, glutamylendopeptidase, sspB, staphopain B, protease. Enterotoxin gene cluster (egc) consist of *seg*, *sei*, *selm*, *seln*, *selo*, *selu*. All isolates were negative for genes encoding Pantone Valentine leucocidin (PVL), toxic shock syndrome toxin 1 (TSST1), exfoliative toxin (ET), Arginine Catabolic Mobile Element (ACME) and epidermal cell differentiation inhibitors (edin).
